# Supplementary material for: Impaired 8-Hydroxyguanine Repair Activity of MUTYH Variant p.Arg109Trp Found in a Japanese Patient with Early-Onset Colorectal Cancer
Source: Hindawi journal article supplement (doi:10.1155/2014/617351), 2014-01-01
Supplement: f1 [file 617351.f1.pdf]

**Supplementary Information**  
**for**  
**Impaired 8-hydroxyguanine repair activity of MUTYH variant p.Arg109Trp**  
**found in a Japanese patient with early-onset colorectal cancer**

**Supplementary Tables S1-S5**

**Supplementary T<sub>ABLE</sub> S1:**

Primers used for PCR amplification of the *MUTYH* gene

**Supplementary T<sub>ABLE</sub> S2:**

Primers used for PCR amplification of the *OGG1* gene

**Supplementary T<sub>ABLE</sub> S3:**

Primers used for PCR-CTPP of the *MUTYH* c.55C>T and c.325C>T variants

**Supplementary T<sub>ABLE</sub> S4:**

*MUTYH* nucleotide variations in its coding region and splice-site region found in 34

Japanese patients with early-onset CRC

**Supplementary T<sub>ABLE</sub> S5:**

*OGG1* nucleotide variations in its coding region found in 34 Japanese patients with  
early-onset CRC

## Supplementary Figures S1 and S2

### Supplementary FIGURE S1:

Identification of novel *OGGI* variants of c.949-89G>T and c.966C>T (p.Asp322Asp) in Japanese patients with early-onset CRC by sequencing analysis

### Supplementary FIGURE S2:

The distribution of *supF* base substitution-type mutations in a *supF* forward mutation assay using the pMY189 plasmid containing 8-hydroxyguanine (8OHG) at position 159 of *supF* in H1299 human cell lines inducibly expressing MUTYH protein

**Supplementary TABLE S1:** Primers used for PCR amplification of the *MUTYH* gene.

| Amplicon number | Forward sequence (5'->3') | Reverse sequence (5'->3') | Product size (bp) |
|-----------------|---------------------------|---------------------------|-------------------|
| 1               | gaagctgcgggagctgaaac      | cggcgacccgacggcgagac      | 160               |
| 2               | ttggcctcattgtgactgac      | gcacctggcccttagtaagtc     | 280               |
| 3               | aggctgctgtgtcccaagac      | gaggacactgctgacctgcc      | 444               |
| 4               | ggcaggtcagcagtgctctc      | ccctagctcctctaccacctg     | 542               |
| 5               | ggtaggaacccaggagtcttg     | agagctcctttgcagacacc      | 406               |
| 6               | ctgcaaaggagctctgcttc      | ctttaggggccaacctagagag    | 463               |
| 7               | taggttgggccctaaagccc      | gccaacgctgtagttcctg       | 448               |
| 8               | tggcaggactgtgggagttc      | caacagagcgattctccgtc      | 488               |
| 9               | tgggattataggcgtgagcc      | acctatggactcaggcctgg      | 239               |
| 10              | tccccaactacaaggcctc       | aacatagcgagacccccatctc    | 278               |

**Supplementary TABLE S2:** Primers used for PCR amplification of the *OGG1* gene.

| Amplicon number | Forward sequence (5'->3') | Reverse sequence (5'->3') | Product size (bp) |
|-----------------|---------------------------|---------------------------|-------------------|
| 1               | cttaagggtcgtggccttg       | gaggggacaggcttctcag       | 268               |
| 2               | catgttgctcagactggaagatag  | cttatgtccaagaaccctaaccc   | 427               |
| 3               | ctctaacggtgctgactctcatt   | gaacagatcttgaaagctgatgg   | 367               |
| 4               | cttgaagatgcctgatgcttg     | ctttctccttctgctctgc       | 346               |
| 5               | gggctataagcaagatgctgg     | gagaagtttctaccatcccagc    | 274               |
| 6               | cacctctccctcagaccctac     | tggggaatttctttgtccag      | 493               |
| 7               | cttgtgcaggacagcaatctc     | atttcattcccaagcaggc       | 473               |

**Supplementary TABLE S3:** Primers used for PCR-CTPP of the *MUTYH* c.55C>T and c.325C>T variants.

| Variant  | Primer name <sup>a</sup> | Primer sequence (5'→3') <sup>b</sup> |
|----------|--------------------------|--------------------------------------|
| c.55C>T  | F1                       | CTTTGCATGTCTCCAGGGCTG                |
| c.55C>T  | F2                       | GGCCATCATGAGGAAGCCAC                 |
| c.55C>T  | R1                       | CACTTCCCACGGCTGCTCA                  |
| c.55C>T  | R2                       | CCTTGGGCCACAACCTAGTTCC               |
| c.325C>T | F1                       | AGCCTGTGCAGGGATGATT                  |
| c.325C>T | F2                       | CTAAGCTGGTACGACCAAGAGAAAC            |
| c.325C>T | R1                       | TCTTCTCCATGGTAGGTCCCA                |
| c.325C>T | R2                       | CATGACCTCTGAGACCCACAC                |

<sup>a</sup>This primer name is corresponded to that in Figure 1C,D.

<sup>b</sup>Nucleotide at the variant position is shown in bold.

**Supplementary TABLE S4:** *MUTYH* nucleotide variations in its coding region and splice-site region found in 34 Japanese patients with early-onset CRC

| Case No. | c.55C>T<br>(p.Arg19*) | c.325C>T<br>(p.Arg109Trp) | c.934-2A>G | c.1014G>C<br>(p.Gln338His) | c.1118C>T<br>(p.Ala373Val) | c.1431G>C<br>(p.Thr477Thr) |
|----------|-----------------------|---------------------------|------------|----------------------------|----------------------------|----------------------------|
| 1        | wt/wt                 | wt/wt                     | wt/wt      | wt/wt                      | wt/wt                      | wt/wt                      |
| 2        | wt/wt                 | wt/wt                     | wt/wt      | wt/wt                      | wt/wt                      | wt/wt                      |
| 3        | wt/wt                 | wt/wt                     | wt/wt      | wt/wt                      | wt/wt                      | wt/wt                      |
| 4        | wt/wt                 | wt/wt                     | wt/wt      | wt/vt                      | wt/wt                      | wt/wt                      |
| 5        | wt/wt                 | wt/wt                     | wt/wt      | wt/vt                      | wt/wt                      | wt/wt                      |
| 6        | wt/wt                 | wt/wt                     | wt/wt      | vt/vt                      | wt/wt                      | wt/wt                      |
| 7        | wt/wt                 | wt/wt                     | wt/vt      | wt/vt                      | wt/wt                      | wt/wt                      |
| 8        | wt/wt                 | wt/wt                     | wt/wt      | wt/vt                      | wt/wt                      | wt/wt                      |
| 9        | wt/wt                 | wt/wt                     | wt/wt      | wt/wt                      | wt/wt                      | wt/wt                      |
| 10       | wt/wt                 | wt/wt                     | wt/wt      | wt/vt                      | wt/wt                      | wt/vt                      |
| 11       | wt/wt                 | wt/wt                     | wt/wt      | wt/vt                      | wt/wt                      | wt/vt                      |
| 12       | wt/wt                 | wt/wt                     | wt/wt      | wt/vt                      | wt/wt                      | wt/wt                      |
| 13       | wt/wt                 | wt/wt                     | wt/wt      | vt/vt                      | wt/wt                      | wt/wt                      |
| 14       | wt/wt                 | wt/wt                     | wt/wt      | wt/vt                      | wt/wt                      | wt/wt                      |
| 15       | wt/wt                 | wt/wt                     | wt/wt      | wt/wt                      | wt/wt                      | wt/wt                      |
| 16       | wt/wt                 | wt/wt                     | wt/wt      | wt/wt                      | wt/wt                      | wt/wt                      |
| 17       | wt/wt                 | wt/wt                     | wt/wt      | wt/vt                      | wt/wt                      | wt/wt                      |
| 18       | wt/wt                 | wt/wt                     | wt/wt      | wt/vt                      | wt/wt                      | wt/wt                      |
| 19       | wt/wt                 | wt/wt                     | wt/wt      | wt/wt                      | wt/wt                      | wt/wt                      |
| 20       | wt/wt                 | wt/wt                     | wt/wt      | wt/wt                      | wt/wt                      | wt/wt                      |
| 21       | wt/wt                 | wt/wt                     | wt/wt      | wt/wt                      | wt/wt                      | wt/wt                      |
| 22       | wt/wt                 | wt/wt                     | wt/wt      | wt/wt                      | wt/wt                      | wt/wt                      |
| 23       | wt/wt                 | wt/wt                     | wt/wt      | wt/vt                      | wt/wt                      | wt/wt                      |
| 24       | wt/wt                 | wt/wt                     | wt/wt      | wt/wt                      | wt/vt                      | wt/wt                      |
| 25       | wt/wt                 | wt/wt                     | wt/wt      | wt/wt                      | wt/wt                      | wt/wt                      |
| 26       | wt/wt                 | wt/wt                     | wt/wt      | vt/vt                      | wt/wt                      | wt/wt                      |
| 27       | wt/vt                 | wt/wt                     | wt/wt      | wt/vt                      | wt/wt                      | wt/wt                      |
| 28       | wt/wt                 | wt/wt                     | wt/wt      | wt/wt                      | wt/wt                      | wt/wt                      |
| 29       | wt/wt                 | wt/wt                     | wt/wt      | vt/vt                      | wt/wt                      | wt/wt                      |
| 30       | wt/wt                 | wt/wt                     | wt/wt      | wt/wt                      | wt/wt                      | wt/wt                      |
| 31       | wt/wt                 | wt/vt                     | wt/wt      | wt/vt                      | wt/wt                      | wt/wt                      |
| 32       | wt/wt                 | wt/wt                     | wt/wt      | wt/vt                      | wt/wt                      | wt/wt                      |
| 33       | wt/wt                 | wt/wt                     | wt/wt      | wt/vt                      | wt/wt                      | wt/wt                      |
| 34       | wt/wt                 | wt/wt                     | wt/wt      | wt/wt                      | wt/wt                      | wt/wt                      |

wt: wild type, vt: variant type.

Genotype containing variant type is shown in red font.

**Supplementary TABLE S5:** *OGGI* nucleotide variations in its coding region found in 34 Japanese patients with early-onset CRC.

| Case No. | c.294G>A<br>(p.Lys98Lys) | c.966C>T<br>(p.Asp322Asp) | c.977C>G<br>(p.Ser326Cys) |
|----------|--------------------------|---------------------------|---------------------------|
| 1        | wt/wt                    | wt/wt                     | wt/vt                     |
| 2        | wt/wt                    | wt/wt                     | vt/vt                     |
| 3        | wt/wt                    | wt/wt                     | wt/wt                     |
| 4        | wt/wt                    | wt/wt                     | wt/vt                     |
| 5        | wt/wt                    | wt/wt                     | wt/vt                     |
| 6        | wt/wt                    | wt/wt                     | wt/vt                     |
| 7        | wt/wt                    | wt/wt                     | wt/vt                     |
| 8        | wt/wt                    | wt/wt                     | wt/wt                     |
| 9        | wt/wt                    | wt/wt                     | wt/wt                     |
| 10       | wt/wt                    | wt/wt                     | wt/wt                     |
| 11       | wt/vt                    | wt/wt                     | wt/wt                     |
| 12       | wt/wt                    | wt/wt                     | wt/wt                     |
| 13       | wt/wt                    | wt/wt                     | wt/vt                     |
| 14       | wt/wt                    | wt/wt                     | wt/vt                     |
| 15       | wt/wt                    | wt/wt                     | vt/vt                     |
| 16       | wt/wt                    | wt/wt                     | wt/vt                     |
| 17       | wt/wt                    | wt/wt                     | wt/wt                     |
| 18       | wt/wt                    | wt/wt                     | wt/wt                     |
| 19       | wt/wt                    | wt/wt                     | wt/vt                     |
| 20       | wt/wt                    | wt/wt                     | vt/vt                     |
| 21       | wt/wt                    | wt/wt                     | vt/vt                     |
| 22       | wt/wt                    | wt/wt                     | wt/vt                     |
| 23       | wt/wt                    | wt/wt                     | wt/wt                     |
| 24       | wt/wt                    | wt/wt                     | wt/vt                     |
| 25       | wt/wt                    | wt/wt                     | vt/vt                     |
| 26       | wt/wt                    | wt/wt                     | vt/vt                     |
| 27       | wt/wt                    | wt/wt                     | wt/vt                     |
| 28       | wt/wt                    | wt/vt                     | wt/vt                     |
| 29       | wt/wt                    | wt/wt                     | wt/wt                     |
| 30       | wt/wt                    | wt/wt                     | wt/vt                     |
| 31       | wt/wt                    | wt/wt                     | wt/vt                     |
| 32       | wt/wt                    | wt/wt                     | wt/wt                     |
| 33       | wt/wt                    | wt/wt                     | wt/vt                     |
| 34       | wt/wt                    | wt/wt                     | wt/vt                     |

wt: wild type, vt: variant type.

Genotype containing variant type is shown in red font.

## LEGENDS FOR SUPPLEMENTARY FIGURES

**Supplementary FIGURE S1:** Identification of novel *OGGI* variants of c.949-89G>T and c.966C>T (p.Asp322Asp) in Japanese patients with early-onset CRC by sequencing analysis. Sequencing electropherograms show a G>T and C>T nucleotide variation at c.949-89 and c.966 position, respectively (lower panels). wt: wild type, vt: variant type. These *OGGI* nucleotide variations have not been reported to date, meaning they are novel *OGGI* variants.

**Supplementary FIGURE S2:** The distribution of *supF* base substitution-type mutations in a *supF* forward mutation assay using the pMY189 plasmid containing 8-hydroxyguanine (8OHG) at position 159 of *supF* in H1299 human cell lines inducibly expressing MUTYH protein. Empty vector-transposed cells and cells inducibly expressing WT type 2 MUTYH, type 2 p.Arg81Trp MUTYH variant, or p.Asp208Asn negative control in the presence of cumate were analyzed.



# Supplementary Figure S1

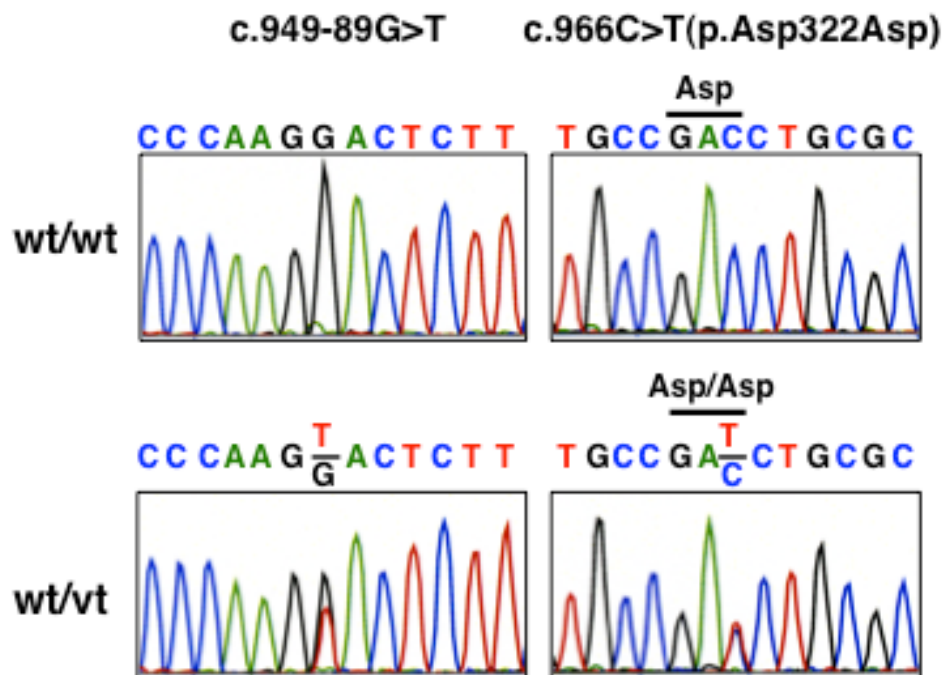

## Supplementary Figure S2

### Empty vector-transposed cells

```

100      110      120      130      140      150      160      170      180
5'-GGTGGGGTTCCCGAGCGGCCAAAGGGAGCAGACTCTAAATCTGCCGTCATCGACTTCGAAGGTTTCGAATCCTTCCCCCACCACC-3'
                                     C
                                     A
                                     T
                                     TTT
                                     TTTT
                                     TTTTTT
                                     TTTTTTTT

```

### WT MUTYH-transposed cells

```

100      110      120      130      140      150      160      170      180
5'-GGTGGGGTTCCCGAGCGGCCAAAGGGAGCAGACTCTAAATCTGCCGTCATCGACTTCGAAGGTTTCGAATCCTTCCCCCACCACC-3'
      C                               T
                                     C
                                     A
                                     T
                                     TTT
                                     TTT

```

### p.R81W MUTYH-transposed cells

```

100      110      120      130      140      150      160      170      180
5'-GGTGGGGTTCCCGAGCGGCCAAAGGGAGCAGACTCTAAATCTGCCGTCATCGACTTCGAAGGTTTCGAATCCTTCCCCCACCACC-3'
      C
                                     C
                                     T
                                     TTT
                                     TTTT
                                     TTTTTT
                                     TTTTTTTT

```

### p.D208N MUTYH-transposed cells

```

100      110      120      130      140      150      160      170      180
5'-GGTGGGGTTCCCGAGCGGCCAAAGGGAGCAGACTCTAAATCTGCCGTCATCGACTTCGAAGGTTTCGAATCCTTCCCCCACCACC-3'
      T
                                     T
                                     TTT
                                     TTTT
                                     TTTTTT
                                     TTTTTTTT

```
